1 **Validation of selective agars for detection and quantification of *Escherichia coli***  
2 **resistant to critically important antimicrobials**

3 **Zheng Z. Lee<sup>a</sup>, Rebecca Abraham<sup>a</sup>, Mark O’Dea<sup>a</sup>, Ali Harb<sup>a</sup>, Kelly Hunt<sup>a</sup>, Terence**  
4 **Lee<sup>a</sup>, Sam Abraham<sup>a\*±</sup>, David Jordan<sup>b±</sup>**

5 <sup>a</sup> Antimicrobial Resistance and Infectious Diseases Laboratory, Murdoch University,  
6 Murdoch, WA, Australia

7 <sup>b</sup> New South Wales Department of Primary Industries, Wollongbar, NSW, Australia

8 \* Corresponding authors: [s.abraham@murdoch.edu.au](mailto:s.abraham@murdoch.edu.au)

9

10 <sup>±</sup> These authors contributed equally to this manuscript

11

## 12 **ABSTRACT**

13 Success in the global fight against antimicrobial resistance (AMR) is likely to improve if  
14 surveillance can be performed more rapidly, affordably and on a larger scale. An approach  
15 based on robotics and agars incorporated with antimicrobials has enormous potential to  
16 achieve this. However, there is a need to identify the combinations of selective agars and key  
17 antimicrobials yielding the most accurate counts of susceptible and resistant organisms. A  
18 series of designed experiments involving 1,202 plates identified the best candidate-  
19 combinations from six commercially available agars and five antimicrobials using 18  
20 *Escherichia coli* strains as either pure cultures or inoculums within faeces. The effect of  
21 various design factors on colony counts were analysed in generalised linear models. Without  
22 antimicrobials, Brilliance™ *E. coli* (Brilliance) and CHROMagar™ ECC (CHROMagar)  
23 agars yielded 28.9% and 23.5% more colonies than MacConkey agar. The order of  
24 superiority of agars remained unchanged when faecal samples with and without spiking of  
25 resistant *E. coli* were inoculated onto agars with or without specific antimicrobials. When  
26 incorporating antimicrobials at varying concentrations, it was revealed that ampicillin,  
27 tetracycline and ciprofloxacin are suitable for incorporation into Brilliance and CHROMagar  
28 agars at all defined concentrations. Gentamicin was only suitable for incorporation at 8 and  
29 16 µg/mL while ceftiofur was only suitable at 1 µg/mL. CHROMagar™ ESBL agar  
30 supported growth of a wider diversity of extended-spectrum cephalosporin-resistant *E. coli*.  
31 The findings demonstrate the potential for combining robotics with agars to deliver AMR  
32 surveillance on a vast scale with greater sensitivity of detection and strategic relevance.

33 **IMPORTANCE** Established models of surveillance for AMR in livestock typically have a  
34 low sampling intensity which creates a tremendous barrier to understanding the variation of  
35 resistance amongst animal and food enterprises. However, developments in laboratory  
36 robotics now make it possible to rapidly and affordably process high volumes of samples.  
37 Combined with modern selective agars incorporating antimicrobials, this forms the basis of a  
38 novel surveillance process for identifying resistant bacteria by chromogenic reaction  
39 including accurately detecting and quantifying their presence even when present at low  
40 concentration. As *Escherichia coli* is a widely preferred indicator bacterium for AMR  
41 surveillance, this study identifies the optimal selective agar for quantifying resistant *E. coli*  
42 by assessing the growth performance on agars with antimicrobials. The findings are the first  
43 step towards exploiting laboratory robotics in an up-scaled approach to AMR surveillance in  
44 livestock with wider adaptations in food, clinical microbiology and public health.

45

## 46 INTRODUCTION

47 Antimicrobial resistance (AMR) has been identified as one of the most serious threats to  
48 animal and human health in the current era (1). A key component for controlling AMR is the  
49 conduct of surveillance to inform on the prevalence and spread of resistant bacteria. The  
50 livestock sector has become a focus for surveillance because of the potential for AMR to  
51 transfer to humans along the food chain. Food products with a propensity to be contaminated  
52 with animal microflora such as ground meat are increasingly included in surveillance because  
53 of the risk of zoonotic pathogens undergoing selection for resistance in the animal gut or  
54 acquiring resistance via horizontal gene transfer (2-5). In both food and livestock,  
55 commensals such as *Escherichia coli* have been widely exploited for use in AMR  
56 surveillance since they readily develop resistance during *in-vivo* exposure to antimicrobials  
57 and are easily isolated as a ubiquitous component of the gut microflora (6). A barrier for  
58 improving surveillance in food and livestock is that the microbroth dilution technique for  
59 evaluating antimicrobial susceptibility of bacterial colonies, as recommended by international  
60 reference organisations, are expensive and labour intensive though the process has adapted  
61 well to a clinical context (7, 8). In national surveillance programs, sampling must typically be  
62 constrained due to the aforementioned drawbacks of the microbroth dilution technique. For  
63 example, fewer than 300 commensal *E. coli* isolates are obtained from the same number of  
64 herds or flocks of a given animal species in a year with food product surveys similarly  
65 affected (9). The inferences that can be drawn from surveillance results are thus often  
66 constrained in scope and frequently fail to support decision making at the coalface of animal  
67 and food production where changes to production management to control AMR arguably  
68 stands to have the greatest benefit. Therefore, an enhanced approach is needed that can  
69 affordably assess a substantially larger number of isolates and samples within an authoritative  
70 design to produce evidence on an epidemiological rather than clinical scale.

71

72 The problem of scale described above has the potential to be resolved using advancements in  
73 laboratory robotics to achieve a vast improvement in throughput of antimicrobial sensitivity  
74 assays. Robotics impart the capacity to rapidly handle samples, bacterial colonies and broth  
75 cultures in a coordinated way that minimises errors that arise from manual processes (10).  
76 This opens the door for efficient detection and quantification of AMR in commensal *E. coli*  
77 by estimating the number of colonies resistant in a given volume of faeces or food. These  
78 data offer a robust alternative for decision making on AMR control measures in food-  
79 producing enterprises. Additionally, the computerised reading, reporting and delivery of  
80 results means decisions can be made sooner. One way that robotics can be exploited is  
81 through large-scale enumeration of resistant *E. coli* from food or faecal samples using a  
82 process akin to agar dilution technique for antimicrobial susceptibility testing (AST). Here,  
83 automated plating of diluted samples onto agars incorporated with antimicrobials is the  
84 foundation. However, conventional solid agar used for this form of AST such as Mueller-  
85 Hinton agar (MHA) or traditional selective agar such as MacConkey (MAC) agar are  
86 unsuitable because they make it impossible to identify the target bacteria based solely on  
87 colony morphology, and especially in the case of MHA, the growth of non-target bacteria is  
88 not adequately suppressed.

89

90 Fortunately, modern selective agars are now commercially available for isolating *E. coli*.  
91 These agars suppress most non-target organisms and achieve accurate colony identification  
92 using a chromogenic reaction (11). One key issue in the use of these agars is whether or not  
93 the activity of antimicrobials that are incorporated is compromised by other agar components  
94 leading to inaccurate counts of resistant *E. coli*. A second key issue is whether or not the

95 plating of diluted samples containing all of the microbial genera that are naturally occurring  
96 in the original samples (faeces or food) interferes with the AST of the target organism (in this  
97 case commensal *E. coli*). Previous studies have shown that MAC agar incorporated with  
98 ciprofloxacin is able to selectively isolate ciprofloxacin-resistant *E. coli* (12-14), although  
99 tetracycline cannot be used with MAC in this way due to interference in antimicrobial  
100 activity by divalent cations (calcium and magnesium salts are an integral component of MAC  
101 agar) (15-19). Similarly, there is a need to evaluate the suitability of commercial selective  
102 agars targeting extended-spectrum cephalosporin (ESC)-resistant *E. coli* such as Brilliance™  
103 ESBL (Brilliance ESBL) and CHROMagar™ ESBL (CHROMagar ESBL) agars for  
104 detection and enumeration under the same conditions. This study aims to address these issues  
105 through three objectives. The first is to identify which selective agars (Brilliance™ *E. coli*  
106 [Brilliance] and CHROMagar™ ECC [CHROMagar] agars) have the best *E. coli* growth  
107 performance (highest colony counts per agar when plated with standardised inoculum) for  
108 accurate enumeration of *E. coli* colonies. Secondly, to identify which combination of specific  
109 antimicrobial (ampicillin, tetracycline, gentamicin, ciprofloxacin and ceftiofur)  
110 concentrations of antimicrobial and selective agars achieve the most accurate enumeration of  
111 resistant *E. coli* (this includes equivalent evaluation of commercial agars for isolation of  
112 ESC-resistant *E. coli*). Thirdly, to assess whether the ability to detect and quantify resistance  
113 is reduced when the target organisms are co-mingled with natural flora present in faecal  
114 samples. Together, the findings will serve to identify the optimal selective agar for achieving  
115 large-scale detection and quantification of resistant *E. coli* in samples from the food chain  
116 using laboratory robotics.

117

## 118 **RESULTS**

119 **Experiment A: Comparison of *E. coli* growth on commercial *E. coli* selective agars.**

120 Three selective agars and one non-selective agar without incorporation of antimicrobials were  
121 compared for the ability to support growth of diverse *E. coli* strains (with and without  
122 resistance to various antimicrobials: Table S1). All *E. coli* strains grew on agar without  
123 antimicrobials. Agar had a highly significant effect ( $P < 0.01$ ) on colony growth with the order  
124 of superiority being Brilliance agar (mean of 78.9 colonies per plate), CHROMagar agar  
125 (mean of 74.7 colonies per plate), MHA (mean of 60 colonies per plate) and MAC agar  
126 (mean of 59 colonies per plate) (Fig. 1). However, though strain did have a significant effect  
127 on colony counts ( $P < 0.001$ ), it did not change the above order of superiority of agars for any  
128 strain (Fig. S1). In summary, *E. coli* counts on Brilliance, CHROMagar and MHA were on  
129 average 28.9%, 23.5% and 1.68% respectively higher than MAC agar (the worst performing).

130

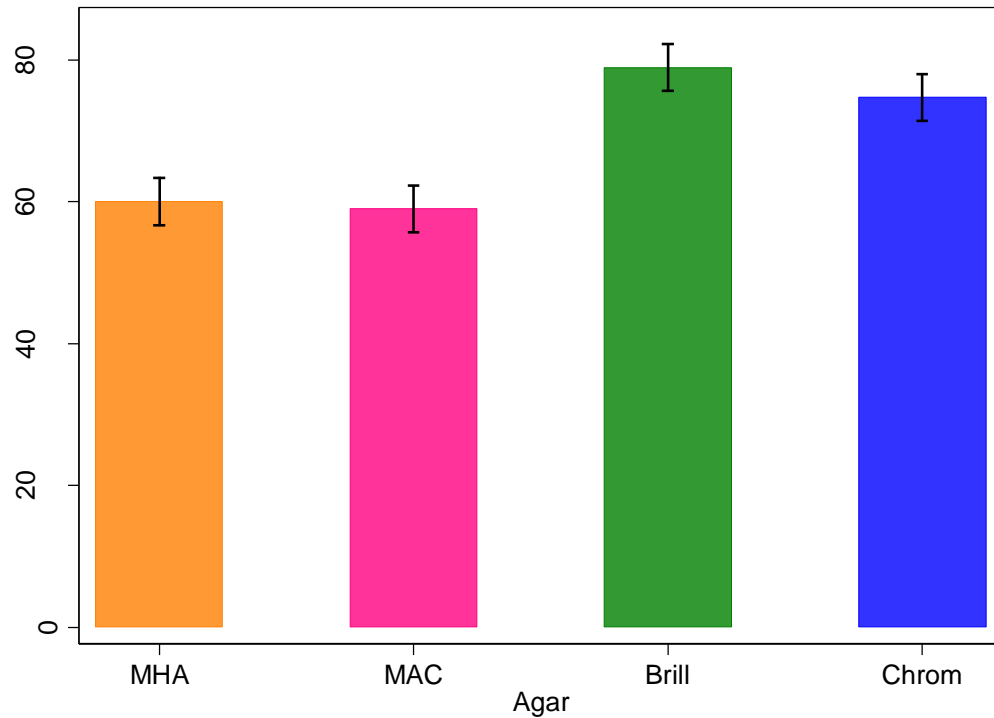

131

132 **FIG 1** Comparisons of *E. coli* growth performance (mean colony counts per plate  $\pm$  se) on  
133 three *E. coli* selective agar and Mueller-Hinton agar (all without antimicrobials) (total  
134 number of plates = 160). Standardised inoculum across all agars consisted of diluted pure  
135 cultures of diverse *E. coli* strains. Key: MHA - Mueller-Hinton agar, MAC - MacConkey  
136 agar, Brill - Brilliance™ *E. coli* agar, Chrom - CHROMagar™ ECC agar.

137



138 All *E. coli* strains susceptible to ampicillin, tetracycline, ciprofloxacin and ceftiofur did not  
139 grow on agars with the corresponding incorporated antimicrobial (at any concentration).  
140 However, *E. coli* strains susceptible to gentamicin grew on MAC (2 and 4 µg/mL), Brilliance  
141 (2 µg/mL) and CHROMagar (2 µg/mL) agars incorporated with gentamicin. All *E. coli*  
142 strains resistant to ampicillin, tetracycline and ciprofloxacin grew on all agars with the  
143 corresponding incorporated antimicrobial (at any concentration). SA1001 was the only  
144 gentamicin-resistant *E. coli* strain that grew on all agars incorporated with gentamicin at all  
145 concentrations while growth of SA44 (also resistant to gentamicin) was not observed on  
146 MHA incorporated with 8 and 16 µg/mL of gentamicin. Ceftiofur-resistant *E. coli* strains  
147 grew on MAC agar when incorporated with ceftiofur (at any concentration). In contrast,  
148 growth was inconsistent on Brilliance and CHROMagar agars when incorporated ceftiofur  
149 concentrations climbed above 1 µg/mL (Fig. S2).

150

151 Separate linear models were constructed for each antimicrobial used. As with agar without  
152 antimicrobials, Brilliance and CHROMagar agars performed consistently better than MAC  
153 agar (Fig. 2). This includes Brilliance and CHROMagar agars incorporated with ceftiofur  
154 which was superior to MAC agar incorporated with ceftiofur (Fig. 2). Antimicrobial  
155 concentration was found to have a significant effect for all antimicrobials tested ( $P < 0.001$ ).  
156 Agar had a significant effect on all antimicrobials except tetracycline ( $P < 0.05$ ) and strain had  
157 significant effects on all except tetracycline and gentamicin ( $P < 0.01$ ). Significant interaction  
158 effects between strain and agar were found for tetracycline, gentamicin and ceftiofur ( $P < 0.05$ ),  
159 between agar and antimicrobial concentration for tetracycline ( $P < 0.01$ ) and ceftiofur  
160 ( $P < 0.001$ ), between strain and antimicrobial concentration for tetracycline and gentamicin  
161 ( $P < 0.05$ ) and between all three factors for gentamicin ( $P < 0.01$ ).

162

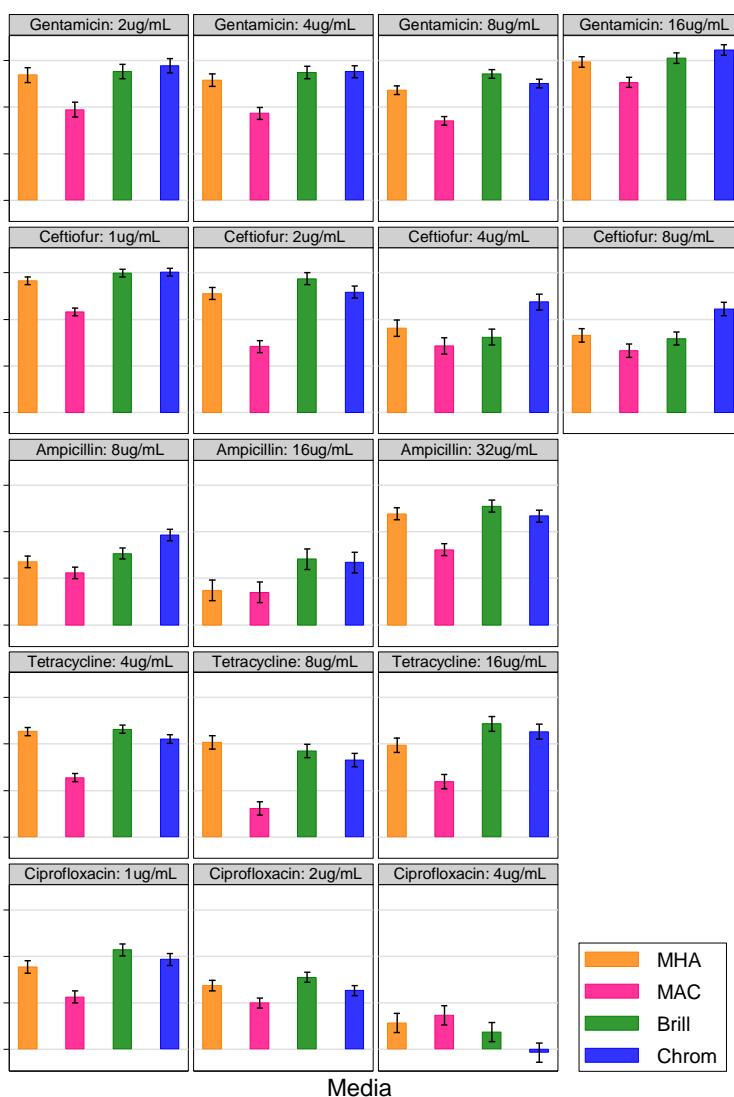

163

164 **FIG 2** Comparisons of *E. coli* growth performance (mean colony counts per plate ± se) on  
 165 three *E. coli* selective agars and Mueller-Hinton agar each incorporated with ampicillin,  
 166 tetracycline, gentamicin, ciprofloxacin or ceftiofur at three or four concentrations (total  
 167 number of plates = 424). Standardised inoculum across all agars consisted of diluted pure  
 168 cultures of diverse *E. coli* strains resistant to each antimicrobial. Key: MHA - Mueller-Hinton  
 169 agar, MAC - MacConkey agar, Brill - Brilliance™ *E. coli* agar, Chrom - CHROMagar™  
 170 ECC agar.

171

172 Finally, the three *E. coli* selective agars with and without incorporation of antimicrobials was  
173 further tested using homogenised bovine faecal samples (with and without spiking of two  
174 fluoroquinolone [FQ]-resistant *E. coli* strains: Table S2). For agars without antimicrobials,  
175 the order of superiority was CHROMagar (mean of 35.6 colonies per plate), Brilliance (mean  
176 of 34.2 colonies per plate) and MAC agars (mean of 29.1 colonies per plate) (Table 1). For  
177 agars incorporated with ciprofloxacin, growth of FQ-resistant *E. coli* strains was observed on  
178 all agars regardless of bacterial concentration and the order of superiority was Brilliance  
179 (mean of 32.8 colonies per plate), CHROMagar (mean of 28.3 colonies per plate) and MAC  
180 (mean of 22.8 colonies per plate) agars (Table 1). In this model, agar ( $P<0.001$ ), strain  
181 ( $P<0.05$ ), bacterial concentration ( $P<0.001$ ) and interactions between agar and bacterial  
182 concentration had significant effects ( $P<0.001$ ).

183

184 **Table 1** Comparisons of *E. coli* and fluoroquinolone-resistant *E. coli* growth performance  
 185 (mean colony counts per plate) on *E. coli* selective agar with and without incorporation of  
 186 ciprofloxacin (total number of plates = 288). Standardised inoculum consisted of  
 187 homogenised bovine faecal samples with and without spiking of fluoroquinolone-resistant *E.*  
 188 *coli* strains. Key: MAC - MacConkey agar, Brilliance - Brilliance™ *E. coli* agar,  
 189 CHROMagar - CHROMagar™ ECC agar.

| Homogenised bovine<br>faecal samples                                         | MAC                       |                       | Brilliance                |                       | CHROMagar                 |                       |
|------------------------------------------------------------------------------|---------------------------|-----------------------|---------------------------|-----------------------|---------------------------|-----------------------|
|                                                                              | Without<br>antimicrobials | With<br>ciprofloxacin | Without<br>antimicrobials | With<br>ciprofloxacin | Without<br>antimicrobials | With<br>ciprofloxacin |
| <b>Without<br/>spiking</b>                                                   | 29.1                      | -                     | 34.2                      | -                     | 35.6                      | -                     |
| <b>Spiked with<br/>fluoroquinolone-<br/>resistant <i>E. coli</i> strains</b> | -                         | 22.8                  | -                         | 28.3                  | -                         | 32.8                  |

190

191 **Experiment B: Comparison of ESC-resistant *E. coli* growth on commercial ESC-**  
192 **resistant *E. coli* selective agars.** Two ESC-resistant *E. coli* selective agars (Brilliance ESBL  
193 and CHROMagar ESBL agars) were compared for the ability to support growth of diverse  
194 ESC-resistant *E. coli* strains (Table S2). The non-selective MHA without antimicrobials was  
195 used as a control agar. All ESC-resistant *E. coli* strains grew on all agars with the exception  
196 of SA27 which did not grow on Brilliance ESBL agar. CHROMagar ESBL agar (mean of  
197 48.24 colonies per plate) best supported growth followed by MHA (mean of 42.72 colonies  
198 per plate) and Brilliance ESBL agar (mean of 28.74 colonies per plate) (Fig. 3) and this order  
199 of superiority was also observed on each ESC-resistant *E. coli* strain (Fig. S3). In this model,  
200 all factors and their associated interactions ( $P < 0.001$ ) had significant effects on colony counts.

201

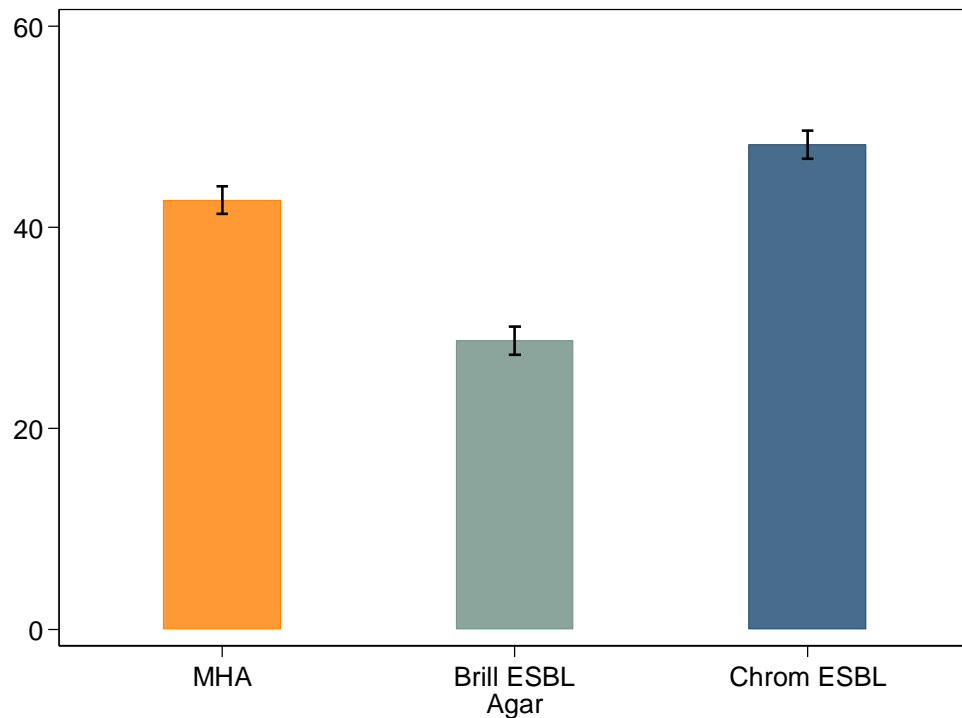

202

203 **FIG 3** Comparisons of ESC-resistant *E. coli* growth performance (mean colony counts per  
204 plate  $\pm$  se) on two ESC-resistant *E. coli* selective agars with Mueller-Hinton agar (without  
205 antimicrobials) present as a control agar (total number of plates = 150). Standardised  
206 inoculum across all agars consisted of diluted pure cultures of diverse ESC-resistant *E. coli*  
207 strains. Key: MHA - Mueller-Hinton agar, Brill ESBL - Brilliance™ ESBL agar, Chrom  
208 ESBL - CHROMagar™ ESBL agar.

209

210 Finally, Brilliance ESBL and CHROMagar ESBL agars were further tested using  
211 homogenised bovine faecal samples spiked with ten ESC-resistant *E. coli* strains (Table S2).  
212 Brilliance ESBL agar (mean of 24.3 colonies per plate) was found to be superior to  
213 CHROMagar ESBL agar (mean of 14.9 colonies per plate) (Fig. 4) with the same superiority  
214 order observed on each ESC-resistant *E. coli* strain (Fig. S4). The only exception was SA27  
215 which did not grow on Brilliance ESBL agar regardless of bacterial concentration. All factors  
216 including associated interactions had significant effects ( $P < 0.001$ ) on colony counts.

217

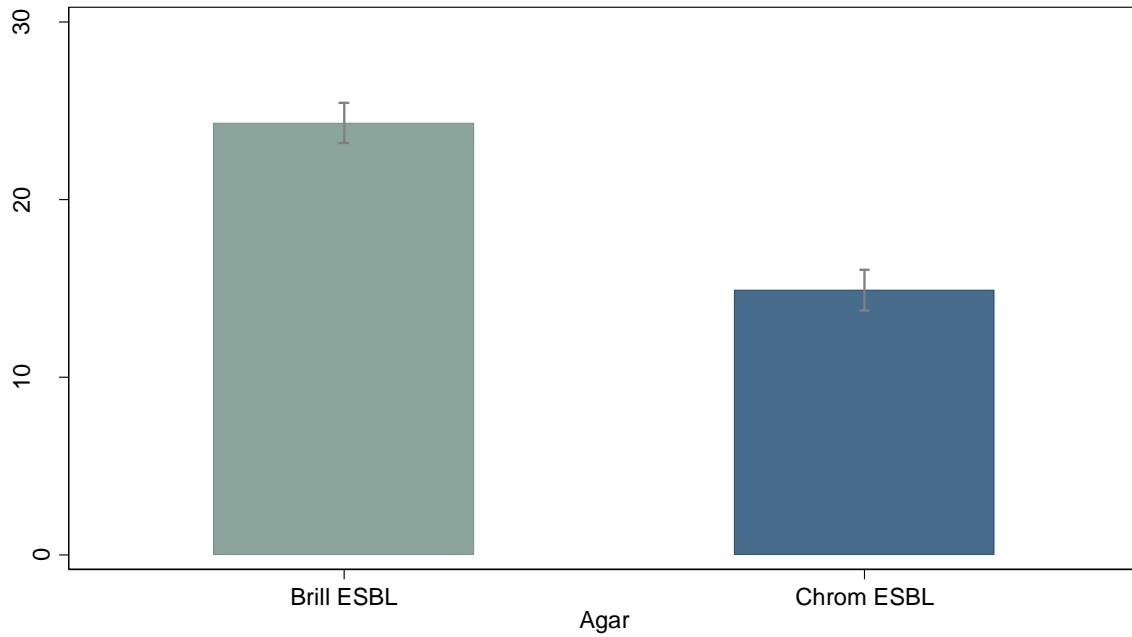

218

219 **FIG 4** Comparisons of ESC-resistant *E. coli* growth performance (mean colony counts per  
220 plate  $\pm$  se) on two ESC-resistant *E. coli* selective agars (total number of plates = 180).  
221 Standardised inoculum across all agars consisted of homogenised bovine faecal samples  
222 spiked with diverse ESC-resistant *E. coli* strains. Key: Brill ESBL - Brilliance™ ESBL agar,  
223 Chrom ESBL - CHROMagar™ ESBL agar.

224



## 225 **DISCUSSION**

226 AMR surveillance in livestock and food products is a critical tool for progressive  
227 antimicrobial stewardship, prevention of AMR spread and the preservation of effective  
228 antimicrobials. Through the combination of high-throughput robotics with selective agar  
229 incorporated with the antimicrobial of interest, it is possible to quantify carriage levels and  
230 prevalence of resistance. With *E. coli* being used as a common indicator bacterium in AMR  
231 surveillance systems (6), this study aimed to identify the optimal selective agar and  
232 antimicrobial concentrations for quantifying populations of resistant *E. coli* for AMR  
233 surveillance in livestock.

234

235 In this study, three selective agars were tested (MAC, Brilliance and CHROMagar agars).  
236 Despite the presence of other experimental factors and interactions significantly affecting  
237 colony counts, both Brilliance and CHROMagar agars were comparable in performance and  
238 consistently superior to MAC agar in all situations (pure cultures, faecal samples and faecal  
239 samples spiked with FQ-resistant *E. coli* strains) as demonstrated through a higher number of  
240 *E. coli* colonies. The superior growth performance on Brilliance and CHROMagar agars can  
241 be attributed to the basic function and design of the agar. Both selective agars were  
242 specifically formulated for growing coliform bacteria and while the exact ingredients within  
243 the selective mix of both agars are undisclosed by the manufacturer, there may be  
244 components that provide specific growth support towards coliform bacteria including *E. coli*.  
245 In contrast, the consistently inferior performance by MAC agar could be attributed to its  
246 components that indiscriminately select for Gram-negative bacteria. Unlike Brilliance and  
247 CHROMagar agars, MAC agar possesses bile salts as its selective component to suppress  
248 Gram-positive bacteria growth by induction of DNA damage (20). However, it is also likely

249 that this bile salt mechanism also indirectly exerts a suppressive effect on *E. coli* growth due  
250 to *E. coli* constantly having to express genes that reduces growth rate in order to repair any  
251 DNA damage (21). Therefore, the indiscriminate selection combined with the suppressive  
252 effect of bile salts in MAC agar presents a more stressful environment for *E. coli* resulting in  
253 an inferior performance which is confirmed in Fig 1. Additionally, this consistent  
254 performance of Brilliance and CHROMagar agars also demonstrated that the capability of  
255 both agars in supporting susceptible and FQ-resistant *E. coli* growth for detection and  
256 quantification was not impeded by the co-presence of faecal microflora.

257

258 Ampicillin, tetracycline, gentamicin, ciprofloxacin and ceftiofur were incorporated into each  
259 agar to identify the best concentration for growing the corresponding resistant *E. coli* for  
260 quantification. MAC agar consistently supported less growth regardless of antimicrobial and  
261 concentration and thus is not considered appropriate for quantitative AMR surveillance. Only  
262 ampicillin, tetracycline and ciprofloxacin were found to be suitable for incorporation into  
263 Brilliance and CHROMagar agars at all defined concentrations with growth of all resistant  
264 strains observed. In contrast, gentamicin was only suitable for incorporation into Brilliance  
265 and CHROMagar agars at 8 and 16 µg/mL as growth of susceptible strains were observed at  
266 lower concentrations. A higher number of susceptible strains grew on CHROMagar agar than  
267 Brilliance agar which suggests a higher level of suppression of gentamicin activity with the  
268 former. Currently, it is difficult to ascertain the mechanism by which this suppression occurs,  
269 although one possibility could be due to the significant three-way interaction between all  
270 factors.

271

272 A significant interaction between agars and ceftiofur was identified which, given the  
273 unexpected growth inhibition of some ceftiofur-resistant *E. coli* strains at higher ceftiofur  
274 concentrations, indicate a likely amplification of ceftiofur activity when incorporated into  
275 each agar. It is also possible that this amplification also extends to 1 µg/mL despite all  
276 ceftiofur-resistant *E. coli* strains growing at this concentration. With the lack of information  
277 in the current literature pertaining to interactions between agar and ceftiofur, further  
278 investigation is needed to explain this phenomenon. Nonetheless, this indicates that ceftiofur  
279 is not suitable for incorporation into Brilliance and CHROMagar agars and we suggest that  
280 either ESC-resistant *E. coli* selective agar such as CHROMagar ESBL agar be used for  
281 quantitative AMR surveillance of ESC-resistant *E. coli* or further investigation into the  
282 viability of using other third-generation cephalosporin antimicrobials such as cefotaxime or  
283 ceftriaxone for incorporation into selective agar.

284

285 Finally, both Brilliance ESBL and CHROMagar ESBL agars had unique advantages. While  
286 Brilliance ESBL agar was superior in supporting growth of ESC-resistant *E. coli* strains from  
287 spiked homogenised faecal samples, CHROMagar ESBL agar was able to support a wider  
288 diversity of ESC-resistant *E. coli* strain. This was evident from the absence of SA27 growth  
289 on Brilliance agar as opposed to its presence of growth on CHROMagar agar regardless if it  
290 was from a pure culture or spiked homogenised faecal sample which also serves to  
291 demonstrate that the interference of SA27 (and thus ESC-resistant *E. coli*) growth on both  
292 agars may likely be due to interactions between strain and agar rather than the co-presence of  
293 faecal microflora. Nevertheless, the capability of CHROMagar ESBL agar to capture a wider  
294 diversity of ESC-resistant *E. coli* makes it better suited for AMR surveillance than Brilliance  
295 ESBL agar as it would increase the probability of detecting ESC-resistant *E. coli*.

296

297 The reason for growth variation between strains was not clear as it was not the principal  
298 feature being evaluated. Most data in the current literature focuses on growth rate of *E. coli*  
299 strains under specific environmental conditions but none have evaluated possible factors  
300 influencing growth rates between *E. coli* strains (22-24). Significant interactions between  
301 strain with agar or antimicrobial are one such factor affecting growth rate but given the  
302 uniformity in performance across all agars with and without incorporation of antimicrobials,  
303 it suggests that this influence towards growth was minimal and not enough to affect the  
304 performance outcome of each agar.

305

306 This study represents the first step towards establishing an enhanced AMR surveillance  
307 approach for assessing AMR in livestock and food products. As opposed to the established  
308 approach of AMR surveillance, this enhanced approach is both qualitative and quantitative in  
309 nature and is built on the capacity to rapidly identify *E. coli* colonies on agars for colony  
310 enumeration. When combined with robotics, it provides exciting opportunities for up-scaling  
311 based on programming and machine learning pathways to allow the identification of *E. coli*  
312 colonies based on colony colour for enumeration with reduced human input and potentially  
313 greater accuracy. The practical ramifications for this are that more accurate information can  
314 be obtained from a greater number of samples that increases the sensitivity of detecting a  
315 given phenotype across a population of animals and herds. It is an especially relevant  
316 technique for early detection of resistance to critically important antimicrobials (CIAs) since  
317 it cannot be assumed that either the level of colonisation is uniform across animals or herds  
318 (25), or that the phenotypes of interest are present at a high enough concentration to be found  
319 by traditional AST means. Moreover, any positive colonies detected can be preserved for

320 genomic interrogation to understand their ecological origins as demonstrated in studies of  
321 human-wildlife-livestock transmission (26).

322

323 Based on this study, we recommend the use of Brilliance and CHROMagar agars with and  
324 without incorporation of antimicrobials as well as CHROMagar ESBL agar in combination  
325 with robotics to evaluate the feasibility of this enhanced approach. Additionally, this  
326 enhanced approach also has promising applications within food, clinical and public health  
327 settings through large-scale qualitative and quantitative AMR surveillance of critically  
328 important antimicrobial-resistant bacteria to support infection control and evaluation of the  
329 effectiveness of antimicrobial stewardship (27).

330

## 331 **MATERIALS AND METHODS**

332 All agars used in this study were commercially available and were used as directed by the  
333 manufacturer with the exception of the incorporation of additional antimicrobials as  
334 demanded by study design.

335

336 **Experiment A: Comparison of *E. coli* selective agars with and without incorporation of**  
337 **antimicrobials.** The performance of growing *E. coli* on three *E. coli* selective agars and a  
338 fourth non-selective control agar with and without incorporation of antimicrobials were  
339 compared using pure cultures of diverse *E. coli* strains. All agars without antimicrobials were  
340 purchased directly from suppliers. The three selective agars used were MAC (Edwards  
341 Group), Brilliance (Thermo Fisher Scientific) and CHROMagar (MicroMedia, Edwards

342 Group) agars. MHA (Edwards Group) was used as the fourth agar and was chosen for  
343 comparison due to its status as the gold standard non-selective agar for routine AST (28). The  
344 same four agars incorporated with antimicrobials were prepared in-house using the agar  
345 dilution technique as per manufacturer instructions. Both Mueller-Hinton broth powder  
346 (Oxoid, Thermo Fisher Scientific) and agar No. 1 powder (Oxoid, Thermo Fisher Scientific)  
347 were used to prepare MHA. MacConkey No. 3 powder (Oxoid, Thermo Fisher Scientific)  
348 was used to prepare MAC agar. Brilliance agar was prepared using Brilliance™ *E.*  
349 *coli*/coliform selective medium powder (Oxoid, Thermo Fisher Scientific) while *E. coli*-  
350 coliforms chromogenic medium (Conda, Edwards Group) was used to prepare CHROMagar  
351 agar. The antimicrobials selected for incorporation into agars were ampicillin, tetracycline,  
352 gentamicin, ciprofloxacin and ceftiofur (from the penicillin, tetracycline, aminoglycoside, FQ  
353 and third-generation cephalosporin families respectively). These were included due to their  
354 importance in the livestock and public health sectors (particularly ciprofloxacin and ceftiofur  
355 which are CIAs for human medicine) and thus often included in AMR surveillance programs  
356 involving livestock and food products (3, 5, 29-32). All antimicrobial stocks were prepared  
357 using antimicrobial powders (Sigma-Aldrich) and stored following Clinical and Laboratory  
358 Standards Institute (CLSI) guidelines (28). All stocks were used within the shelf life detailed  
359 by the manufacturer. Prior to pouring into petri dishes, antimicrobials were added to sterilised  
360 agars after being cooled in a 60 °C water bath, to obtain specific concentrations for each  
361 respective antimicrobial. Three concentrations were chosen for ampicillin (8, 16 and 32  
362 µg/mL), tetracycline (4, 8 and 16 µg/mL) and ciprofloxacin (1, 2 and 4 µg/mL) while four  
363 were chosen for gentamicin (2, 4, 8 and 16 µg/mL) and ceftiofur (1, 2, 4 and 8 µg/mL). All  
364 concentrations were chosen to cover the clinical breakpoints for *E. coli* as listed by CLSI with  
365 the epidemiological cut-off points (ECOFF) listed by the European Committee of  
366 Antimicrobial Susceptibility Testing (EUCAST) covered for ampicillin, tetracycline,

367 gentamicin and ceftiofur (33). After the addition of antimicrobials, 20 mL of the agar mixture  
368 was poured into 90 mm diameter circular petri dishes and left to solidify under a laminar flow  
369 hood. All agars incorporated with antimicrobials were stored in the dark at 4 °C and used  
370 within two weeks of preparation.

371

372 Eight *E. coli* strains were chosen with ATCC 25922 included as the quality control strain  
373 while the remaining seven strains were *E. coli* isolated from different animal species. SA44  
374 was isolated from pigs (34), SA1000, SA1001 and SA1002 were isolated from Australian  
375 Silver Gulls (26), and SA1003, SA1004 and SA1005 were archival in-house strains (Table  
376 S1). The rationale for selection of these strains was to achieve diversity in origin to capture  
377 variations potentially present in wild type populations of *E. coli*. Prior to the commencement  
378 of the experiment, minimal inhibitory concentration (MIC) testing using the microbroth  
379 dilution method was performed on all *E. coli* strains according to CLSI guidelines to confirm  
380 the resistance profile of each strain (28) (Table S1). All growth observations on agars  
381 incorporated with antimicrobials were compared to the resistance profile shown for each  
382 strain. After overnight growth on Columbia sheep blood agar (Edwards Group), a suspension  
383 of each *E. coli* strain meeting the 0.5 McFarland standard was prepared using a nephelometer  
384 (Sensititre). Each standardised inoculum underwent 10-fold serial dilution to  $10^{-5}$  in sterile 1  
385 x phosphate buffered saline. Inoculation was performed by dispensing 80  $\mu$ L of the  $10^{-5}$   
386 inoculum onto agar without antimicrobials and spread evenly across the agar surface using a  
387 sterile loop. Inoculation on agars without antimicrobials was repeated for a total of five  
388 replicates per combination of agar and strain while inoculation on agars incorporated with  
389 antimicrobials was repeated for a total of two replicates per combination of agar, strain and  
390 antimicrobial concentration. All agars were incubated between 16 to 20 hours at 37 °C.

391 Presumptive identification of *E. coli* on Brilliance and CHROMagar agars was performed  
392 based on colony colour as detailed by the manufacturer. For MAC agar, pink colonies were  
393 presumed to be *E. coli* due to most *E. coli* strains being known to be lactose fermenters.  
394 Being a non-selective agar, *E. coli* colonies on MHA appear colourless.

395

396 Homogenised bovine faecal samples were used as field samples to verify the performance for  
397 growing *E. coli* on the same three *E. coli* selective agars without antimicrobials. All agars  
398 without antimicrobials were purchased from the same suppliers described above. Twenty  
399 bovine faecal samples from the Murdoch University farm were sampled. All faecal samples  
400 were collected from fresh faecal piles and processed on the same day of collection.  
401 Approximately 2 g of each faecal sample was homogenised for 30 seconds in 18 mL of sterile  
402 1x phosphate buffered saline (PBS) using a BagMixer<sup>®</sup> 400 P laboratory blender  
403 (Interscience, Edwards Group). This was repeated two more times to obtain a total of three  
404 replicates per sample. The homogenised mixture of each replicate underwent a 10-fold serial  
405 dilution and 80 µL of each dilution factor at 10<sup>-1</sup> was inoculated onto each agar and spread  
406 evenly across the agar surface using a sterile loop. The procedure for agar incubation and  
407 presumptive identification of *E. coli* on agar were the same described above for agars without  
408 antimicrobials.

409

410 Homogenised bovine faecal samples spiked with FQ-resistant *E. coli* strains was used as field  
411 samples to further evaluate the performance for growing FQ-resistant *E. coli* on the same  
412 three *E. coli* selective agars incorporated with 4 µg/mL of ciprofloxacin (Table S2). All agars  
413 were prepared in the same manner described above for agars incorporated with antimicrobials.



414 A ST131 and ST744 *E. coli* strain isolated from Australian Silver Gulls was chosen for  
415 inoculation into faecal samples due to their ubiquity as FQ-resistant *E. coli* strains  
416 internationally in both humans and animals (26, 35-38). The first ten bovine faecal samples  
417 used previously were chosen for pooling. Each pooled sample consists of five individual  
418 samples to form a total of two pooled samples. For each pooled sample, approximately 2 g of  
419 each individual faecal sample (total of approximately 10 g) was homogenised for 30 seconds  
420 in 90 mL of sterile 1x phosphate buffered saline (PBS) using a BagMixer<sup>®</sup> 400 P laboratory  
421 blender (Interscience, Edwards Group). This was repeated two more times to obtain a total of  
422 three replicates per pool sample. After overnight growth on Columbia sheep blood agar  
423 (Edwards Group), a suspension of each *E. coli* strain meeting the 0.5 McFarland standard was  
424 prepared using a nephelometer (Sensititre) and inoculated into the homogenised mixture of  
425 each replicate to obtain bacterial concentrations of  $10^3$ ,  $10^5$  and  $10^7$  colony forming units per  
426 gram (CFU/g). Mixtures containing  $10^5$  and  $10^7$  CFU/g were serially diluted to  $10^{-1}$  and  $10^{-3}$   
427 dilution factor respectively. 80  $\mu$ L of  $10^3$ ,  $10^5$  and  $10^7$  at neat,  $10^{-1}$  and  $10^{-3}$  dilution factor  
428 respectively were inoculated onto each agar and spread evenly across the agar surface using a  
429 sterile loop. The procedure for agar incubation and presumptive identification of *E. coli* on  
430 agar were the same as described above for agars incorporated with antimicrobials. ATCC  
431 25922 was also inoculated onto each agar as quality control.

432

433 **Experiment B: Comparison of ESC-resistant *E. coli* selective agars.** The performance of  
434 growing ESC-resistant *E. coli* on two ESC-resistant *E. coli* selective agars were compared  
435 using pure cultures of diverse ESC-resistant *E. coli* strains (Table S2). All agars were  
436 purchased directly from suppliers. Brilliance ESBL (Thermo Fisher Scientific) and  
437 CHROMagar ESBL (MicroMedia, Edwards Group) agars were the two ESC-resistant *E. coli*

438 selective agars while MHA (Thermo Fisher Scientific) was selected as the non-selective agar.  
439 The supplier for MHA in Experiment B differed from Experiment A, however the  
440 formulation of the agar was the same. Ten ESC-resistant *E. coli* strains were chosen with  
441 each strain harbouring a different gene conferring resistance to ESCs in order to encompass  
442 the wide genotypic variations present in ESC-resistant *E. coli* strains (Table S2). SA44 and  
443 SA1001 were the only two strains from Experiment A included in Experiment B (Table S2).  
444 Of the remaining eight strains, SA27 was isolated from pigs (35) while SA1074, SA1075,  
445 SA1076, SA1077, SA1078, SA1079 and SA1080 were isolated from Australian Silver Gulls  
446 (26) (Table S2). The procedure for culturing ESC-resistant *E. coli* strains, McFarland  
447 standard preparation, agar inoculation (including replicate numbers) and incubation, and  
448 presumptive identification of *E. coli* on MHA were the same as Experiment A using pure  
449 cultures of *E. coli* strains. Presumptive identification of ESC-resistant *E. coli* on Brilliance  
450 ESBL and CHROMagar ESBL agars were performed based on colony colour detailed by the  
451 manufacturer. ATCC 25922 was also inoculated onto each agar as quality control.

452

453 Homogenised bovine faecal samples spiked with ESC-resistant *E. coli* strains was used as  
454 field samples to verify the performance for growing ESC-resistant *E. coli* on the same two  
455 ESC-resistant *E. coli* selective agars (Table S2). Ten ESC-resistant *E. coli* strains were also  
456 chosen with nine strains, SA27, SA44, SA1001, SA1074, SA1075, SA1076, SA1077,  
457 SA1079 and SA1080, being the same strains described above while the last strain, SA1083,  
458 was another strain previously isolated from Australian Silver Gulls (26) (Table S2). The first  
459 five bovine faecal samples used previously in Experiment A were chosen for pooling. The  
460 procedure for pooling, strain inoculation into homogenised faecal mixture, agar inoculation  
461 (including replicate numbers) and incubation were the same as Experiment A when using

462 homogenised bovine faecal samples spiked with FQ-resistant *E. coli* strains on agars  
463 incorporated with ciprofloxacin with the exception that only Brilliance ESBL and  
464 CHROMagar ESBL agars were used. Presumptive identification of ESC-resistant *E. coli* on  
465 agar was the same as described above. ATCC 25922 was also inoculated onto each agar as  
466 quality control.

467

468 **Statistical analysis.** Statistical analysis used the linear model framework in Stata version  
469 16.0 (Stata Corporation, TX, USA). All analyses were fixed effect models with the count of *E.*  
470 *coli* colonies on each plate as the outcome with results expressed (in text and figures) as the  
471 mean effect of each level of the factor of interest (eg. agar type or bacterial strain) and  
472 adjusted for other terms in the model. For experiments based on pure cultures of *E. coli*  
473 strains, a model was constructed for agars without antimicrobials, and one model for each  
474 antimicrobial when incorporated into agars. In the latter case, only *E. coli* strains resistant to  
475 the antimicrobial being evaluated was included in the linear model. For experiments based on  
476 faecal samples spiked with a mixture of *E. coli* strains, the analysis was similar although the  
477 factor representing bacterial strain was not.

478

479 **Acknowledgements**

480 This project was supported by the Australian Department of Agriculture, Water and the  
481 Environment. We thank Professor John Turnidge for critical review of the manuscript.

482 **Competing interests:** None declared

483 **Ethical approval:** Not required

484

## 485 REFERENCES

486

- 487 1. World Health Organization. 2014. Antimicrobial resistance: Global report on surveillance.  
488 World Health Organization, Switzerland.
- 489 2. Aarestrup FM, Wegener HC, Collignon P. 2008. Resistance in bacteria of the food chain:  
490 epidemiology and control strategies. *Expert Rev Anti Infect Ther* 6:733-750.
- 491 3. Abraham S, O'Dea M, Sahibzada S, Hewson K, Pavic A, Veltman T, Abraham R, Harris T, Trott  
492 DJ, Jordan D. 2019. *Escherichia coli* and *Salmonella* spp. isolated from Australian meat  
493 chickens remain susceptible to critically important antimicrobial agents. *PLoS One* 14.
- 494 4. Mukerji S, O'Dea M, Barton M, Kirkwood R, Lee T, Abraham S. 2017. Development and  
495 transmission of antimicrobial resistance among Gram-negative bacteria in animals and their  
496 public health impact. *Essays Biochem* 61:23-35.
- 497 5. Nekouei O, Checkley S, Waldner C, Smith BA, Invik J, Carson C, Avery B, Sanchez J, Gow S.  
498 2018. Exposure to antimicrobial-resistant *Escherichia coli* through the consumption of  
499 ground beef in Western Canada. *Int J Food Microbiol* 272:41-48.
- 500 6. World Health Organization. 2021. Global tricycle surveillance ESBL *E. coli*. World Health  
501 Organization, Switzerland.
- 502 7. European Food Safety Authority, Aerts M, Battisti A, Hendriksen R, Kempf I, Teale C,  
503 Tenhagen BA, Veldman K, Wasyl D, Guerra B, Liebana E, Thomas-Lopez D, Beloeil PA. 2019.  
504 Technical specifications on harmonised monitoring of antimicrobial resistance in zoonotic  
505 and indicator bacteria from food-producing animals and food. *EFSA J* 17.
- 506 8. Humphries RM, Ambler J, Mitchell SL, Castanheira M, Dingle T, Hindler JA, Koeth L, Sei K,  
507 CLSI Methods Development and Standardization Working Group of the Subcommittee on  
508 Antimicrobial Susceptibility Testing. 2018. CLSI methods development and standardization  
509 working group best practices for evaluation of antimicrobial susceptibility tests. *J Clin*  
510 *Microbiol* 56.
- 511 9. DANMAP. 2017. DANMAP 2016 - Use of antimicrobial agents and occurrence of  
512 antimicrobial resistance in bacteria from food animals, food and humans in Denmark.  
513 DANMAP, Denmark.
- 514 10. Truswell A, Abraham R, O'Dea M, Lee ZZ, Lee T, Laird T, Blinco J, Kaplan S, Turnidge J, Trott  
515 DJ, Jordan D, Abraham S. 2021. Robotic Antimicrobial Susceptibility Platform (RASP): a next-  
516 generation approach to One Health surveillance of antimicrobial resistance. *J Antimicrob*  
517 *Chemother* doi:10.1093/jac/dkab107.
- 518 11. Perry JD, Freydiere AM. 2007. The application of chromogenic media in clinical microbiology.  
519 *J Appl Microbiol* 103:2046-2055.
- 520 12. Grohs P, Tillecovidin B, Caumont-Prim A, Carbonnelle E, Day N, Podglajen I, Gutmann L. 2013.  
521 Comparison of five media for detection of extended-spectrum beta-lactamase by use of the  
522 Wasp instrument for automated specimen processing. *J Clin Microbiol* 51:2713-2716.
- 523 13. Huang TD, Bogaerts P, Berhin C, Guisset A, Glupczynski Y. 2010. Evaluation of Brilliance ESBL  
524 agar, a novel chromogenic medium for detection of extended-spectrum-beta-lactamase-  
525 producing *Enterobacteriaceae*. *J Clin Microbiol* 48:2091-2096.
- 526 14. Pultz MJ, Nerandzic MM, Stiefel U, Donskey CJ. 2008. Emergence and acquisition of  
527 fluoroquinolone-resistant Gram-negative bacilli in the intestinal tracts of mice treated with  
528 fluoroquinolone antimicrobial agents. *Antimicrob Agents Chemother* 52:3457-3460.
- 529 15. Blaser J, Luthy R. 1988. Comparative study on antagonistic effects of low pH and cation  
530 supplementation on in-vitro activity of quinolones and aminoglycosides against  
531 *Pseudomonas aeruginosa*. *J Antimicrob Chemother* 22:15-22.
- 532 16. D'Amato RF, Thornsberry C, Baker CN, Kirven LA. 1975. Effect of calcium and magnesium  
533 ions on the susceptibility of *Pseudomonas* species to tetracycline, gentamicin, polymyxin B,  
534 and carbenicillin. *Antimicrob Agents Chemother* 7:596-600.

- 535 17. Fass RJ, Barnishan J. 1979. Effect of divalent cation concentrations on the antibiotic  
536 susceptibilities of nonfermenters other than *Pseudomonas aeruginosa*. *Antimicrob Agents*  
537 *Chemother* 16:434-438.
- 538 18. Girardello R, Bispo PJM, Yamanaka TM, Gales AC. 2012. Cation concentration variability of  
539 four distinct Mueller-Hinton agar brands influences polymyxin B susceptibility results. *J Clin*  
540 *Microbiol* 50:2414-2418.
- 541 19. Marshall AJ, Piddock LJ. 1994. Interaction of divalent cations, quinolones and bacteria. *J*  
542 *Antimicrob Chemother* 34:465-483.
- 543 20. Begley M, Gahan CG, Hill C. 2005. The interaction between bacteria and bile. *FEMS Microbiol*  
544 *Rev* 29:625-651.
- 545 21. Merritt ME, Donaldson JR. 2009. Effect of bile salts on the DNA and membrane integrity of  
546 enteric bacteria. *J Med Microbiol* 58:1533-1541.
- 547 22. Haberbeck LU, Oliveira RC, Vivijis B, Wenseleers T, Aertsen A, Michiels C, Geeraerd AH. 2015.  
548 Variability in growth/no growth boundaries of 188 different *Escherichia coli* strains reveals  
549 that approximately 75% have a higher growth probability under low pH conditions than *E.*  
550 *coli* O157:H7 strain ATCC 43888. *Food Microbiol* 45:222-30.
- 551 23. Smirnova GV, Oktyabrsky ON. 2018. Relationship between *Escherichia coli* growth rate and  
552 bacterial susceptibility to ciprofloxacin. *FEMS Microbiol Lett* 365.
- 553 24. Thakur CS, Brown ME, Sama JN, Jackson ME, Dayie TK. 2010. Growth of wildtype and mutant  
554 *E. coli* strains in minimal media for optimal production of nucleic acids for preparing labeled  
555 nucleotides. *Appl Microbiol Biotechnol* 88:771-9.
- 556 25. Persoons D, Bollaerts K, Smet A, Herman L, Heyndrickx M, Martel A, Butaye P, Catry B,  
557 Haesebrouck F, Dewulf J. 2011. The importance of sample size in the determination of a  
558 flock-level antimicrobial resistance profile for *Escherichia coli* in broilers. *Microb Drug Resist*  
559 17:513-9.
- 560 26. Mukerji S, Stegger M, Truswell AV, Laird T, Jordan D, Abraham RJ, Harb A, Barton M, O'Dea  
561 M, Abraham S. 2019. Resistance to critically important antimicrobials in Australian silver  
562 gulls (*Chroicocephalus novaehollandiae*) and evidence of anthropogenic origins. *J Antimicrob*  
563 *Chemother* 74:2566-2574.
- 564 27. Perry JD. 2017. A decade of development of chromogenic culture media for clinical  
565 microbiology in an era of molecular diagnostics. *Clin Microbiol Rev* 30:449-479.
- 566 28. Clinical and Laboratory Standards Institute. 2018. M07-A11: Methods for dilution  
567 antimicrobial susceptibility tests for bacteria that grow aerobically; Approved Standard -  
568 Eleventh Edition. Clinical and Laboratory Standards Institute, USA.
- 569 29. Abraham S, O'Dea M, Page SW, Trott DJ. 2017. Current and future antimicrobial resistance  
570 issues for the Australian pig industry. *Anim Prod Sci* 57:2398-2407.
- 571 30. Kidsley AK, Abraham S, Bell JM, O'Dea M, Laird TJ, Jordan D, Mitchell P, McDevitt CA, Trott  
572 DJ. 2018. Antimicrobial susceptibility of *Escherichia coli* and *Salmonella* spp. isolates from  
573 healthy pigs in Australia: Results of a pilot national survey. *Front Microbiol* 9.
- 574 31. Moodley A, Guardabassi L. 2009. Transmission of IncN plasmids carrying *bla*<sub>CTX-M-1</sub> between  
575 commensal *Escherichia coli* in pigs and farm workers. *Antimicrob Agents Chemother*  
576 53:1709-1711.
- 577 32. van Breda LK, Dhungyel OP, Ward MP. 2018. Antibiotic resistant *Escherichia coli* in  
578 southeastern Australian pig herds and implications for surveillance. *Zoonoses Public Health*  
579 65:e1-e7.
- 580 33. Clinical and Laboratory Standards Institute. 2018. M100: Performance Standards for  
581 Antimicrobial Susceptibility Testing - Twenty Eighth Edition. Clinical and Laboratory  
582 Standards Institute, USA.
- 583 34. Abraham S, Kirkwood RN, Laird T, Saputra S, Mitchell T, Singh M, Linn B, Abraham RJ, Pang S,  
584 Gordon DM, Trott DJ, O'Dea M. 2018. Dissemination and persistence of extended-spectrum

- 585 cephalosporin-resistance encoding IncI1-blaCTXM-1 plasmid among *Escherichia coli* in pigs.  
586 ISME J 12:2352-2362.
- 587 35. Abraham S, Jordan D, Wong HS, Johnson JR, Toleman MA, Wakeham DL, Gordon DM,  
588 Turnidge JD, Mollinger JL, Gibson JS, Trott DJ. 2015. First detection of extended-spectrum  
589 cephalosporin- and fluoroquinolone-resistant *Escherichia coli* in Australian food-producing  
590 animals. J Glob Antimicrob Resist 3:273-277.
- 591 36. Garcia-Fernandez A, Villa L, Bibbolino G, Bressan A, Trancassini M, Pietropaolo V, Venditti M,  
592 Antonelli G, Carattoli A. 2020. Novel Insights and Features of the NDM-5-Producing  
593 *Escherichia coli* Sequence Type 167 High-Risk Clone. mSphere 5.
- 594 37. Gronthal T, Osterblad M, Eklund M, Jalava J, Nykasenoja S, Pekkanen K, Rantala M. 2018.  
595 Sharing more than friendship - transmission of NDM-5 ST167 and CTX-M-9 ST69 *Escherichia*  
596 *coli* between dogs and humans in a family, Finland, 2015. Euro Surveill 23.
- 597 38. Guenther S, Aschenbrenner K, Stamm I, Bethe A, Semmler T, Stubbe A, Stubbe M,  
598 Batsajkhan N, Glupczynski Y, Wieler LH, Ewers C. 2012. Comparable high rates of extended-  
599 spectrum-beta-lactamase-producing *Escherichia coli* in birds of prey from Germany and  
600 Mongolia. PLoS One 7:e53039.

601
